# Supplementary material
Source: bioRxiv or medRxiv preprint supplement (https://www.biorxiv.org/highwire/filestream/86123/field_highwire_adjunct_files/9/098178-18.pdf)

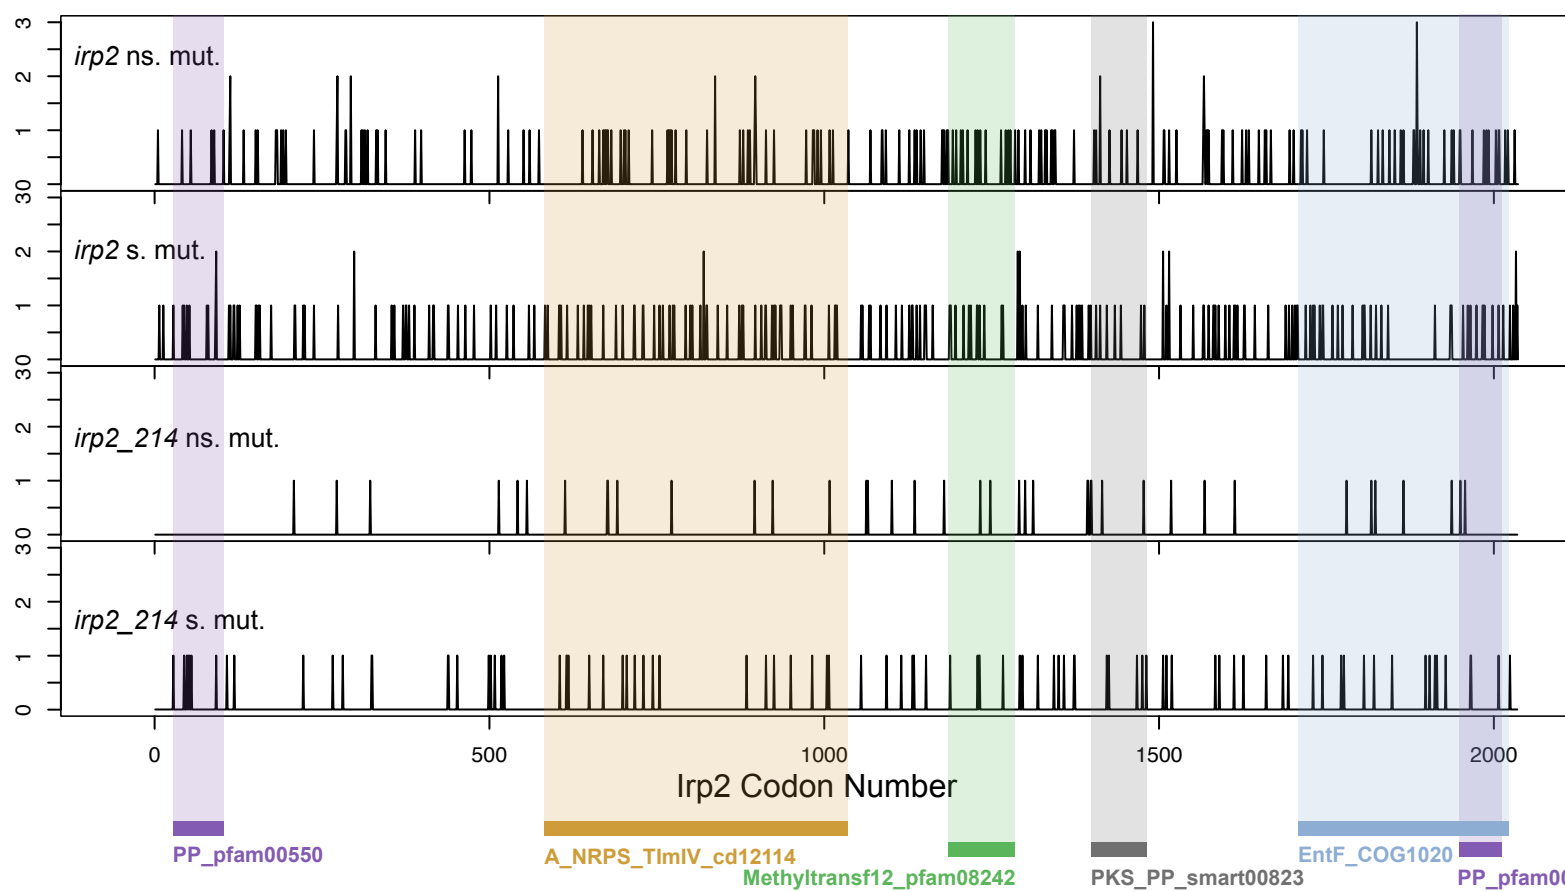

*irp2\_214* - >117 SNPs  
*irp1\_215* - >175 SNPs

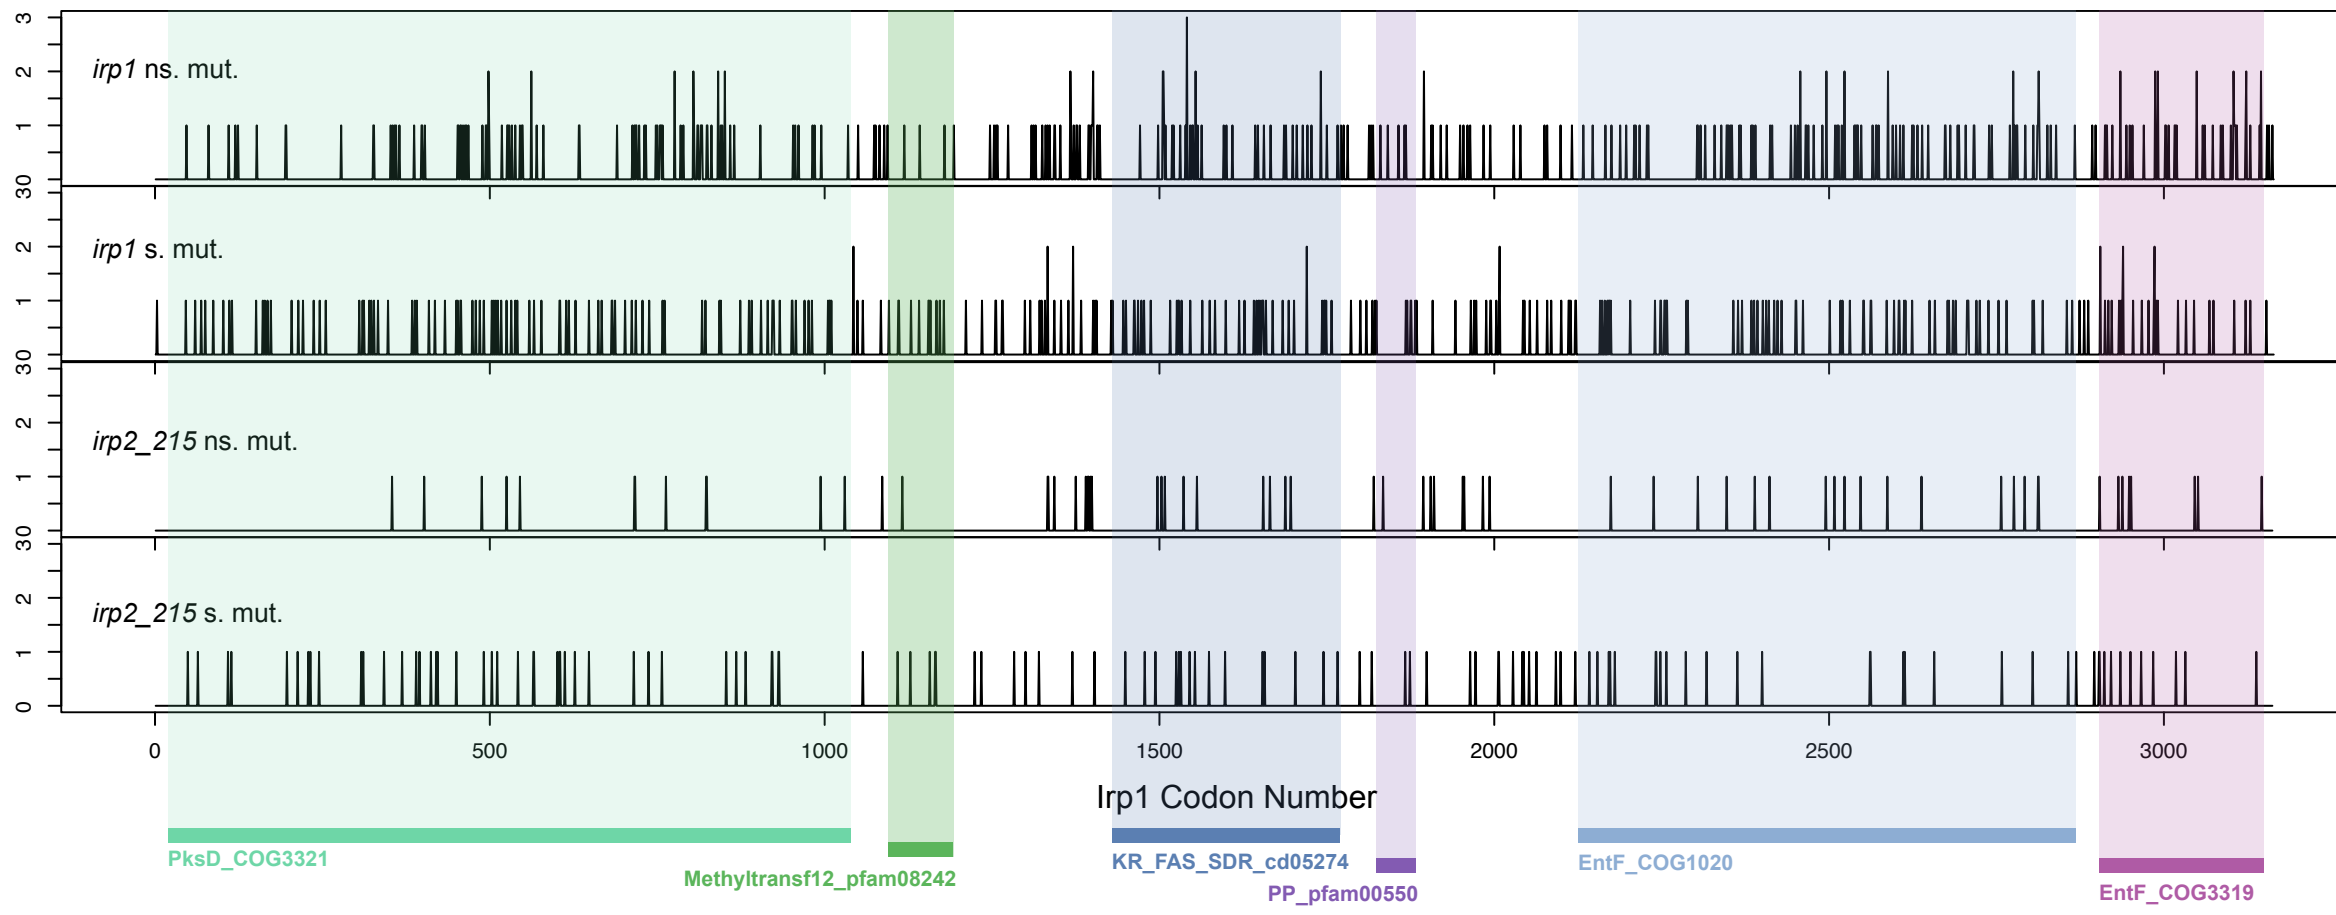

Supplement: Supplementary file [file 098178-18.pdf]
